# Supplementary material for: Excess Ascorbate is a Chemical Stress Agent against Proteins and Cells
Source: PubMed Central journal article supplement (PMC7344896; doi:10.3390/ph13060107), 2020-05-27
Supplement: pharmaceuticals-13-00107-s001.pdf [file pharmaceuticals-13-00107-s001.pdf]

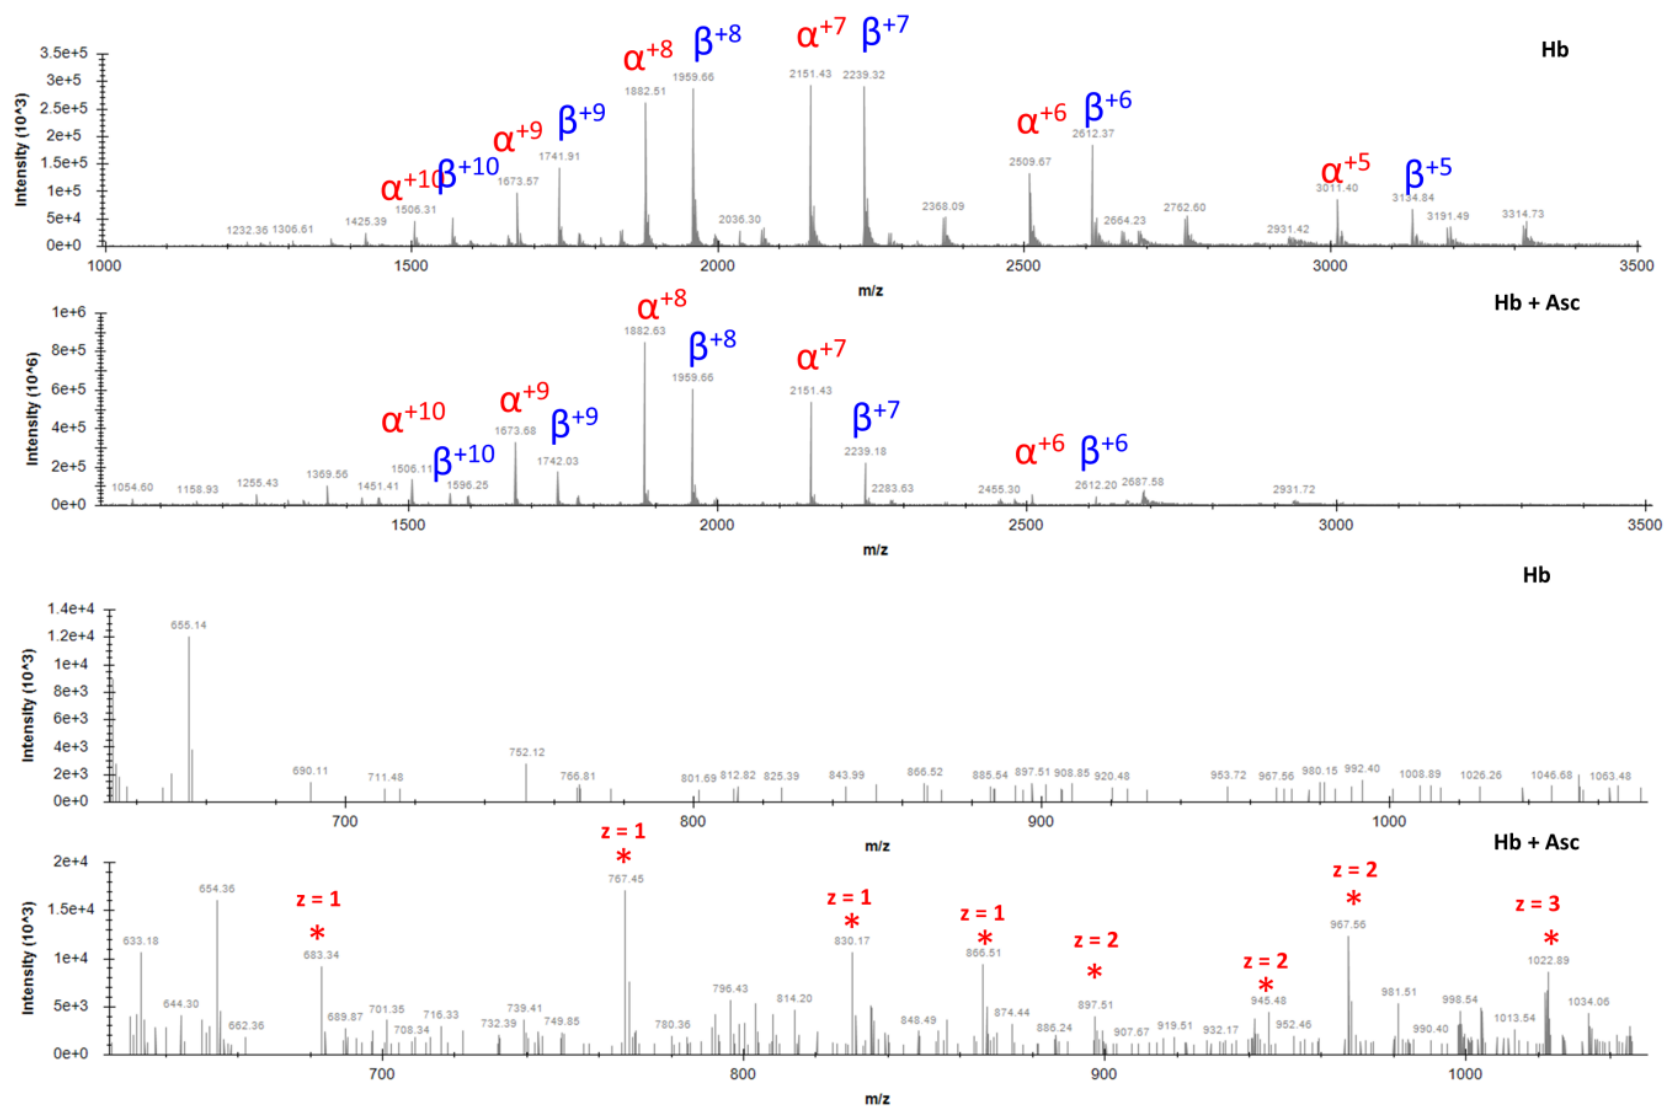

Figure S1. ESI(+)-MS spectra of met hemoglobin before and after ascorbate treatment (in ammonium acetate buffer, pH 5), in the whole m/z region as well as in the low m/z region. The  $\alpha$  and  $\beta$  subunits are indicated along with the corresponding charge. The extra peaks in the low m/z region are indicated with \* and their charge.

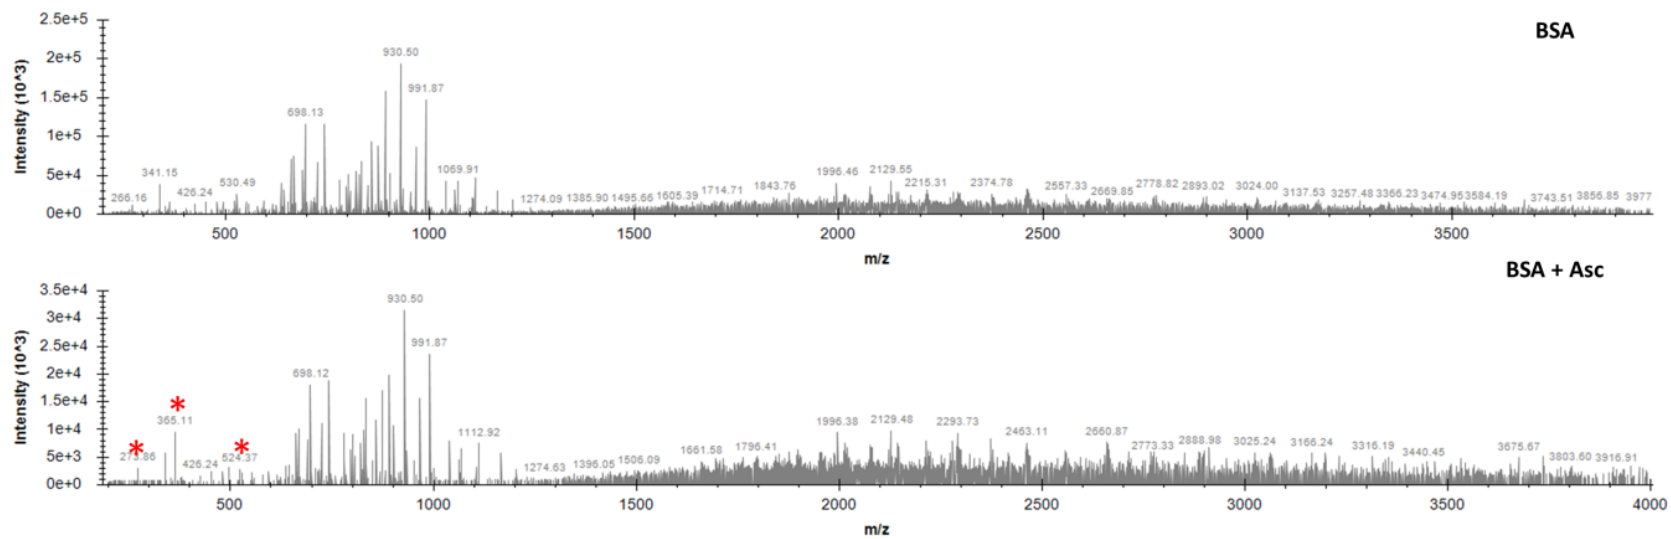

Figure S2. ESI(+)-MS spectra of albumin before and after ascorbate treatment (in ammonium acetate buffer, pH 5). The extra peaks in the low m/z region are indicated with \* and their charge.
